# Supplementary material for: Waste-to-worth: nano activated carbon from fruit peels for sulfur-free sugarcane juice clarification
Source: Royal Society of Chemistry journal article supplement (doi:10.1039/d6ra01408a), 2026-05-08
Supplement: d6ra01408a1.pdf [file d6ra01408a1.pdf]

## Supplementary Materials

### **Waste-to-Worth: Nano activated carbon from fruit peels for sulfur-free sugarcane juice clarification**

**Ramesh Duraisamy<sup>a</sup>, Wabi Regasa Bogale<sup>a,b</sup> and Gada Muleta Fanta<sup>a,c,d,\*</sup>**

<sup>a</sup>Department of Chemistry, College of Natural and Computational Sciences, Arba Minch University, P.O. Box 21, Arba Minch, Ethiopia.

<sup>b</sup>Department of Industrial Chemistry, College of Natural and Computational Sciences, Bule Hora University, P.O. Box 144, Bule Hora, Ethiopia.

<sup>c</sup>Department of Materials Science and Engineering, Adama Science and Technology University, P.O. Box 1888, Adama, Ethiopia.

<sup>d</sup>Center of Advanced Materials Science and Engineering, Adama Science and Technology University, P.O. Box 1888, Adama, Ethiopia.

\* Corresponding author: gada.muleta@astu.edu.et (G.M. Fanta)

#### **Optimisation procedure of the mixing proportion of fruit peels**

As seen in Table S1, the quadratic model of the central composite design (CCD) methodology of three factors of response surface (RSM) has been used to determine the best combination of independent variables (parts of avocado, banana, and papaya fruit peels mixed, total amount of mixed peels kept at 100 g). Design-expert software (v. 13.0.5.0, USA) was used, and the data was analyzed using the RSM approach. In this study, the number of peels (100 g) of avocado (A), banana (B), and papaya (C) peels, with various ratios (1 to 3), was selected as the independent variable for the experiment. Carbon yield (%) was used as the response variable to optimize the combination of independent variables.

As shown in the experimental design in Table S1, peel waste was added and homogenized, yielding a high yield of mixed peel waste. Then, a better peel ratio was optimized to achieve a higher carbon yield using Design-Expert software v. 13.0.5.0. The optimized peel ratio was used for activation and carbonization to synthesized nano activated carbon (NAC).

**Table S1.** Experimental design for optimising the fruit peel powder mixing proportion and the nano activated carbon preparation.

| Run | Independent variables to optimize the proportions of fruit peel (parts) |                |                | Independent variables to optimize the nano activated carbon preparation |                |         |
|-----|-------------------------------------------------------------------------|----------------|----------------|-------------------------------------------------------------------------|----------------|---------|
|     | A: Avocado peel                                                         | B: Banana peel | C: Papaya peel | A: Impregnation ratio                                                   | B: Temperature | C: Time |
| 1   | 27.03                                                                   | 27.03          | 45.94          | 33.3:66.7                                                               | 700            | 100     |
| 2   | 14.3                                                                    | 42.85          | 42.85          | 33.3:66.7                                                               | 400            | 100     |
| 3   | 42.85                                                                   | 42.85          | 14.3           | 50:50                                                                   | 700            | 40      |
| 4   | 33.33                                                                   | 33.33          | 33.34          | 50:50                                                                   | 400            | 70      |
| 5   | 42.85                                                                   | 14.3           | 42.85          | 25:75                                                                   | 550            | 70      |
| 6   | 43.5                                                                    | 43.5           | 13.0           | 40:60                                                                   | 550            | 70      |
| 7   | 27.03                                                                   | 45.94          | 27.03          | 25:75                                                                   | 338            | 70      |
| 8   | 45.94                                                                   | 27.03          | 27.03          | 25:75                                                                   | 762            | 28      |
| 9   | 43.5                                                                    | 13.0           | 43.5           | 25:75                                                                   | 550            | 112     |
| 10  | 33.33                                                                   | 33.33          | 33.34          | 25:75                                                                   | 550            | 70      |
| 11  | 33.33                                                                   | 33.33          | 33.34          | 25:75                                                                   | 550            | 70      |
| 12  | 13.0                                                                    | 43.5           | 43.5           | 25:75                                                                   | 550            | 100     |

Triplicate experiments (n=3) were performed.

#### **Experimental design for optimisation of cane juice clarification using NAC**

The experimental design with two levels of each factor yields 23 runs (including 21 basic runs and 2 replicate central points). Independent variables and their levels were used as shown in Table 3.3: NAC concentration (A: 0.002 - 0.02 %), pH (B: 4 - 8) of juice, clarification time (C: 20 - 100 minutes), clarification temperature (D: 40 – 90 °C) and Agitation speed (100 - 250 rpm). The clarification conditions for optimization levels are selected based on preliminary experiments and literature (Borhan, 2015; Mohammad-Khah and Ansari, 2009). The selected dependent variables used, as shown in Table S2, are turbidity (NTU), mud volume (mL), settling rate, and clarification efficiency (%).

**Table S2.** Experimental design for the clarification of cane juice for raw sugar production

| Run | Independent variables |     |       |     |     | Dependent variables (responses) |                           |                 |                              |
|-----|-----------------------|-----|-------|-----|-----|---------------------------------|---------------------------|-----------------|------------------------------|
|     | A                     | B   | C     | D   | E   | Turbidity (NTU)                 | Settling rate (cm/minute) | Mud volume (mL) | Color removal efficiency (%) |
| 1   | 0.02                  | 8   | 20    | 90  | 100 |                                 |                           |                 |                              |
| 2   | 0.027                 | 6   | 60    | 65  | 200 |                                 |                           |                 |                              |
| 3   | 0.011                 | 9.6 | 60    | 65  | 200 |                                 |                           |                 |                              |
| 4   | 0.011                 | 6   | 60    | 19  | 200 |                                 |                           |                 |                              |
| 5   | 0.02                  | 8   | 20    | 40  | 250 |                                 |                           |                 |                              |
| 6   | 0.011                 | 6   | 60    | 65  | 200 |                                 |                           |                 |                              |
| 7   | 0.011                 | 6   | 60    | 65  | 200 |                                 |                           |                 |                              |
| 8   | 0.011                 | 6   | 60    | 111 | 200 |                                 |                           |                 |                              |
| 9   | 0.011                 | 6   | 12.8  | 65  | 200 |                                 |                           |                 |                              |
| 10  | 0.002                 | 8   | 100   | 40  | 250 |                                 |                           |                 |                              |
| 11  | 0.002                 | 4   | 20    | 40  | 100 |                                 |                           |                 |                              |
| 12  | 0.005                 | 6   | 60    | 65  | 200 |                                 |                           |                 |                              |
| 13  | 0.02                  | 4   | 100   | 90  | 100 |                                 |                           |                 |                              |
| 14  | 0.02                  | 8   | 100   | 40  | 100 |                                 |                           |                 |                              |
| 15  | 0.002                 | 8   | 100   | 90  | 100 |                                 |                           |                 |                              |
| 16  | 0.002                 | 4   | 100   | 90  | 175 |                                 |                           |                 |                              |
| 17  | 0.011                 | 6   | 132.8 | 65  | 200 |                                 |                           |                 |                              |
| 18  | 0.011                 | 6   | 60    | 65  | 250 |                                 |                           |                 |                              |
| 19  | 0.011                 | 6   | 60    | 65  | 175 |                                 |                           |                 |                              |
| 20  | 0.02                  | 4   | 20    | 90  | 250 |                                 |                           |                 |                              |
| 21  | 0.002                 | 8   | 20    | 90  | 250 |                                 |                           |                 |                              |
| 22  | 0.02                  | 4   | 100   | 40  | 175 |                                 |                           |                 |                              |
| 23  | 0.011                 | 2.4 | 60    | 65  | 200 |                                 |                           |                 |                              |

A: Nano activated carbon dose (g); B: pH; C: Time (minutes); D: Temperature (°C); E: Agitation speed (rpm); Triplicate experiments were performed (n=3)

The processing conditions were optimized by lowering turbidity and mud volume, and by increasing other responses (settling rate and clarification efficiency). The regression model was used to generate 3D response plots and contour maps for optimization and to describe the influence of the parameters (independent variables) according to the literature (Mada et al., 2022). Based on the experimental design (shown in Table 3.3), 100 mL of extracted cane juice was taken into a measuring cylinder to set the experimental conditions; then, the respective responses were recorded. In this study, each experimental run was performed in triplicate, and the result is presented as mean  $\pm$  SD. Results were analyzed using the RSM-CCD quadratic model in Design-Expert software (v. 13.0.5.0, USA).

**Table S3.** ANOVA results for the quadratic model of percent carbon yield obtained from the mixed fruit peels (MFP) under carbonization.

| Source         | Sum of Squares | Df | Mean Square | F-value | p-value |                 |
|----------------|----------------|----|-------------|---------|---------|-----------------|
| Model          | 65.02          | 9  | 7.22        | 512.50  | 0.0019  | Significant     |
| A-Avocado      | 26.45          | 1  | 26.45       | 1876.23 | 0.0005  |                 |
| B-Banana       | 8.48           | 1  | 8.48        | 601.50  | 0.0017  |                 |
| C-papaya       | 0.4380         | 1  | 0.4380      | 31.08   | 0.0307  |                 |
| AB             | 0.0114         | 1  | 0.0114      | 0.8066  | 0.4639  |                 |
| AC             | 12.56          | 1  | 12.56       | 891.33  | 0.0011  |                 |
| BC             | 0.4657         | 1  | 0.4657      | 33.04   | 0.0290  |                 |
| A <sup>2</sup> | 6.04           | 1  | 6.04        | 428.32  | 0.0023  |                 |
| B <sup>2</sup> | 0.0537         | 1  | 0.0537      | 3.81    | 0.1901  |                 |
| C <sup>2</sup> | 1.07           | 1  | 1.07        | 75.82   | 0.0129  |                 |
| Residual       | 0.0282         | 2  | 0.0141      |         |         |                 |
| Lack of Fit    | 0.0282         | 1  | 0.0282      | 4.11    | 0.5327  | non-significant |
| Pure Error     | 5.000E-07      | 1  | 5.000E-07   |         |         |                 |
| Cor Total      | 65.05          | 11 |             |         |         |                 |

Triplicate experiments (n=3) were performed

**Table S4.** Analysis of variance (ANOVA) results for the fixed carbon contents and surface area on synthesized nano activated carbon (NAC) from mixed fruit peel wastes.

| Source         | Sum of Squares |           | df | Mean Square |          | F-value |        | p-value |        |                 |
|----------------|----------------|-----------|----|-------------|----------|---------|--------|---------|--------|-----------------|
|                | FCC            | SA        |    | FCC         | SA       | FCC     | SA     | FCC     | SA     |                 |
| <b>Model</b>   | 512.70         | 1.660E+05 | 9  | 56.97       | 18446.92 | 1227.41 | 96.15  | 0.0008  | 0.0103 | Significant     |
| A: IR          | 0.0782         | 424.24    | 1  | 0.0782      | 424.24   | 1.69    | 2.21   | 0.3237  | 0.2754 |                 |
| B: Temp.       | 9.64           | 874.95    | 1  | 9.64        | 874.95   | 207.72  | 4.56   | 0.0048  | 0.0162 |                 |
| C: Time        | 58.88          | 12400.33  | 1  | 58.88       | 12400.33 | 1268.59 | 64.64  | 0.0008  | 0.0151 |                 |
| AB             | 203.96         | 10276.19  | 1  | 203.96      | 10276.19 | 4394.43 | 53.56  | 0.0002  | 0.0182 |                 |
| AC             | 49.62          | 16101.29  | 1  | 49.62       | 16101.29 | 1069.15 | 83.93  | 0.0009  | 0.0117 |                 |
| BC             | 213.03         | 25253.29  | 1  | 213.03      | 25253.29 | 4589.93 | 131.63 | 0.0002  | 0.0075 |                 |
| A <sup>2</sup> | 99.41          | 61484.60  | 1  | 99.41       | 61484.60 | 2141.94 | 320.48 | 0.0005  | 0.0031 |                 |
| B <sup>2</sup> | 8.45           | 573.13    | 1  | 8.45        | 573.13   | 182.12  | 2.99   | 0.0054  | 0.2261 |                 |
| C <sup>2</sup> | 86.80          | 9570.22   | 1  | 86.80       | 9570.22  | 1870.27 | 49.88  | 0.0005  | 0.0195 |                 |
| Residual       | 0.0928         | 383.70    | 2  | 0.0464      | 191.85   |         |        |         |        |                 |
| Lack of Fit    | 0.0928         | 383.70    | 1  | 0.0928      | 383.70   | 0.8143  |        | 0.3776  |        | Non-significant |
| Pure Error     | 0.0000         | 0.0000    | 1  | 0.0000      | 0.0000   |         |        |         |        |                 |
| Cor Total      | 512.80         | 1.664E+05 | 11 |             |          |         |        |         |        |                 |

IR: impregnation ratio (A); Temp.: temperature (B); C: time; FCC: fixed carbon content; SA: surface area. Triplicate experiments (n=3) were performed.

**Table S5.** Results of analysis of variance for the turbidity and settling rate in clarification of cane juice using NAC

| Source         | Turbidity      |             |          |          |         | Settling rate  |             |           |          |         |
|----------------|----------------|-------------|----------|----------|---------|----------------|-------------|-----------|----------|---------|
|                | Sum of Squares | Mean Square | F-value  | p-value  | T-value | Sum of Squares | Mean Square | F-value   | p-value  | T-value |
| Model          | 1.131E+07      | 5.655E+05   | 7660.89  | 0.0001   | 860.96  | 0.4280         | 0.0214      | 37614.13  | < 0.0001 | 67.82   |
| A              | 8.611E+5       | 8.611E+05   | 11664.87 | < 0.0001 | -254.70 | 0.0824         | 0.0824      | 1.448E+05 | < 0.0001 | 49.94   |
| B              | 1.773E+6       | 1.773E+06   | 24019.27 | < 0.0001 | 260.80  | 0.0648         | 0.0648      | 1.139E+05 | < 0.0001 | -28.81  |
| C              | 9.280E+5       | 9.280E+05   | 12570.46 | < 0.0001 | -186.05 | 0.0658         | 0.0658      | 1.156E+05 | < 0.0001 | -35.40  |
| D              | 1.003E+6       | 1.003E+06   | 13590.50 | < 0.0001 | -189.19 | 0.0761         | 0.0761      | 1.337E+05 | < 0.0001 | 28.53   |
| E              | 13812.88       | 13812.88    | 187.11   | 0.0053   | 36.75   | 0.0020         | 0.0020      | 3599.77   | 0.0003   | -0.59   |
| AB             | 25201.27       | 25201.27    | 341.38   | 0.0029   | -41.60  | 0.0321         | 0.0321      | 56360.88  | < 0.0001 | 7.03    |
| AC             | 2.650E+5       | 2.650E+05   | 3589.20  | 0.0003   | 138.75  | 0.0003         | 0.0003      | 474.13    | 0.0021   | 6.02    |
| AD             | 1.362E+5       | 1.362E+05   | 1845.50  | 0.0005   | 100.01  | 0.0785         | 0.0785      | 1.380E+05 | < 0.0001 | 7.05    |
| AE             | 86223.77       | 86223.77    | 1168.01  | 0.0009   | 79.82   | 0.0597         | 0.0597      | 1.049E+05 | < 0.0001 | 7.04    |
| BC             | 2.224E+5       | 2.224E+05   | 3012.44  | 0.0003   | -127.51 | 0.1150         | 0.1150      | 2.021E+05 | < 0.0001 | 6.54    |
| BD             | 5.712E+5       | 5.712E+05   | 7737.73  | 0.0001   | -203.41 | 0.0002         | 0.0002      | 357.09    | 0.0028   | 4.94    |
| BE             | 85863.26       | 85863.26    | 1163.13  | 0.0009   | -79.23  | 0.0069         | 0.0069      | 12214.52  | < 0.0001 | 4.94    |
| CD             | 3643.28        | 3643.28     | 49.35    | 0.0197   | 15.19   | 0.0362         | 0.0362      | 63666.92  | < 0.0001 | 6.55    |
| CE             | 2730.83        | 2730.83     | 36.99    | 0.0260   | 13.08   | 0.0471         | 0.0471      | 82783.11  | < 0.0001 | 6.55    |
| DE             | 6782.83        | 6782.83     | 91.88    | 0.0107   | -22.69  | 0.0081         | 0.0081      | 14280.65  | < 0.0001 | 4.94    |
| A <sup>2</sup> | 2.000E+5       | 2.000E+05   | 2709.61  | 0.0004   | 120.60  | 0.0373         | 0.0373      | 65524.35  | < 0.0001 | 2.57    |
| B <sup>2</sup> | 1.172E+5       | 1.172E+05   | 1587.00  | 0.0006   | -93.52  | 0.0003         | 0.0003      | 507.05    | 0.0020   | 1.10    |
| C <sup>2</sup> | 1.136E+5       | 1.136E+05   | 1539.27  | 0.0006   | 88.98   | 0.0191         | 0.0191      | 33613.46  | < 0.0001 | 1.67    |
| D <sup>2</sup> | 22626.37       | 22626.37    | 306.50   | 0.0032   | -41.96  | 0.0055         | 0.0055      | 9596.65   | 0.0001   | 1.10    |
| E <sup>2</sup> | 2.290E+5       | 2.290E+05   | 3102.37  | 0.0003   | -130.05 | 0.0163         | 0.0163      | 28712.64  | < 0.0001 | 1.10    |
| Resi. error    | 147.64         | 73.82       |          |          |         | 1.138E-6       | 5.689E-7    |           |          |         |
| Lock of fit    | 0.0000         | 0.0000      | 1.29     | 0.3122   |         | 1.138E-6       | 1.138E-6    | 0.2232    | 0.6388   |         |
| Pure error     | 0.0000         | 0.0000      |          |          |         | 0.0000         | 0.0000      |           |          |         |
| Cor Total      | 1.131E+7       |             |          |          |         | 0.4280         |             |           |          |         |

A: NAC dose; B: pH; C: Time; D: Temperature; E: Agitation speed. Triplicate experiments (n=3) were performed

**Table S6.** Results of analysis of variance for the mud volume and color removal efficiencies in clarification of cane juice using NAC

| Source         | Mud volume     |             |          |          |         | Color removal efficiency |             |          |          |         |
|----------------|----------------|-------------|----------|----------|---------|--------------------------|-------------|----------|----------|---------|
|                | Sum of Squares | Mean Square | F-value  | p-value  | T-value | Sum of Squares           | Mean Square | F-value  | p-value  | T-value |
| Model          | 36.01          | 1.80        | 5062.55  | 0.0001   | 68.82   | 2122.57                  | 106.13      | 10842.68 | < 0.0001 | 758.14  |
| A              | 4.68           | 4.68        | 13158.91 | < 0.0001 | 9.51    | 103.14                   | 103.14      | 10537.12 | < 0.0001 | 88.65   |
| B              | 7.22           | 7.22        | 20301.15 | < 0.0001 | -12.50  | 345.32                   | 345.32      | 35279.74 | < 0.0001 | -79.93  |
| C              | 2.72           | 2.72        | 7656.79  | 0.0001   | 5.14    | 18.24                    | 18.24       | 1863.08  | 0.0005   | 19.09   |
| D              | 1.38           | 1.38        | 3874.09  | 0.0003   | 3.91    | 231.13                   | 231.13      | 23613.02 | < 0.0001 | 49.13   |
| E              | 0.0578         | 0.0578      | 162.52   | 0.0061   | -1.27   | 7.61                     | 7.61        | 776.97   | 0.0013   | 18.36   |
| AB             | 0.0022         | 0.0022      | 6.23     | 0.1299   | -0.07   | 1.80                     | 1.80        | 183.95   | 0.0054   | 7.30    |
| AC             | 3.11           | 3.11        | 8735.04  | 0.0001   | -9.33   | 0.0143                   | 0.0143      | 1.46     | 0.3506   | 0.53    |
| AD             | 0.7026         | 0.7026      | 1975.67  | 0.0005   | -4.50   | 38.57                    | 38.57       | 3940.18  | 0.0003   | -33.04  |
| AE             | 0.3998         | 0.3998      | 1124.27  | 0.0009   | -3.43   | 0.5129                   | 0.5129      | 52.40    | 0.0186   | 3.94    |
| BC             | 0.5096         | 0.5096      | 1432.84  | 0.0007   | 4.08    | 29.42                    | 29.42       | 3005.95  | 0.0003   | 28.95   |
| BD             | 3.58           | 3.58        | 10058.90 | < 0.0001 | 10.16   | 0.3638                   | 0.3638      | 37.17    | 0.0259   | 3.36    |
| BE             | 1.16           | 1.16        | 3256.34  | 0.0003   | 5.82    | 28.41                    | 28.41       | 2902.54  | 0.0003   | 28.57   |
| CD             | 0.0218         | 0.0218      | 61.27    | 0.0159   | 0.85    | 6.94                     | 6.94        | 709.18   | 0.0014   | -14.16  |
| CE             | 0.0087         | 0.0087      | 24.51    | 0.0385   | -0.47   | 0.0000                   | 0.0000      | 0.0044   | 0.9532   | -0.09   |
| DE             | 0.4610         | 0.4610      | 1296.27  | 0.0008   | 3.48    | 15.22                    | 15.22       | 1554.82  | 0.0006   | -20.74  |
| A <sup>2</sup> | 1.88           | 1.88        | 5298.72  | 0.0002   | -7.48   | 1.26                     | 1.26        | 128.55   | 0.0077   | 2.57    |
| B <sup>2</sup> | 2.05           | 2.05        | 5753.56  | 0.0002   | 7.60    | 71.33                    | 71.33       | 7287.69  | 0.0001   | 1.10    |
| C <sup>2</sup> | 0.0005         | 0.0005      | 1.39     | 0.3590   | -0.19   | 11.83                    | 11.83       | 1208.38  | 0.0008   | 1.67    |
| D <sup>2</sup> | 0.2006         | 0.2006      | 563.97   | 0.0018   | 2.68    | 97.68                    | 97.68       | 9979.67  | 0.0001   | 1.10    |
| E <sup>2</sup> | 1.23           | 1.23        | 3459.48  | 0.0003   | 5.80    | 8.95                     | 8.95        | 914.48   | 0.0011   | 1.10    |
| Residual       | 0.0007         | 0.0004      |          |          |         | 0.0196                   | 0.0098      |          |          |         |
| Lack of Fit    | 0.0007         | 0.0007      | 0.0457   | 0.8317   |         | 0.0196                   | 0.0196      | 1.59     | 0.2142   |         |
| Pure Error     | 0.0000         | 0.0000      |          |          |         | 0.0000                   | 0.0000      |          |          |         |
| Cor Total      | 36.01          |             |          |          |         | 2122.59                  |             |          |          |         |

A: NAC dose; B: pH; C: Time; D: Temperature; E: Agitation speed; Triplicate experiments (n=3) were performed
